# Supplementary material for: mtDNA-Server: next-generation sequencing data analysis of human mitochondrial DNA in the cloud
Source: PubMed Central journal article supplement — Nucleic Acids Res. 2016 Apr 15;44(Web Server issue):W64–9. doi: 10.1093/nar/gkw247 (PMC4987870; doi:10.1093/nar/gkw247), 2016-04-15
Supplement: supp_gkw247_SupplementaryMaterial.pdf [file supp_gkw247_SupplementaryMaterial.pdf]

## Supplementary Material - mtDNA-Server

Supplementary Figure 1: Sample Mix-ups of HM625679.1 and KC286589.1

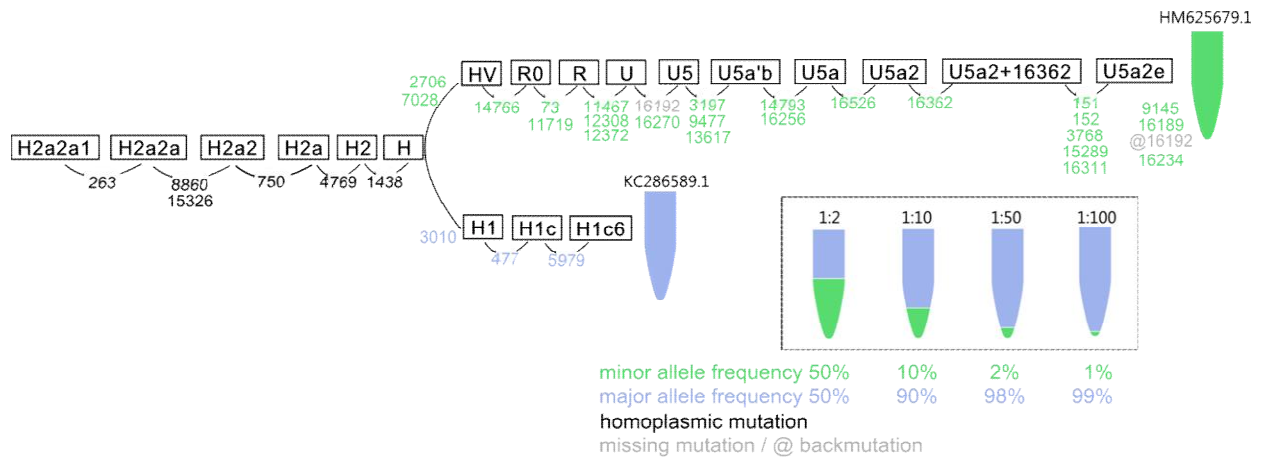

### Figure Description:

We validated our approach based on 4 different sample-mix ups on Illumina HiSeq and on the IonTorrent PGM. Therefore, we mixed 2 samples in the laboratory as follows: M1 – 1:2 (50%), M2 – 1:10 (10%), M3 – 1:50 (2%), M4 – 1:100 (1%).

Sample 1: HM625679.1 <http://www.ncbi.nlm.nih.gov/nuccore/301505851> (Haplogroup U5a2e)

Sample 2: KC286589.1 <http://www.ncbi.nlm.nih.gov/nuccore/445067603> (Haplogroup H1c6)

Excluded from Sample 1: 15372

Excluded from Sample 2: 7076, 9462, 11150, 15236, 16129

27 expected sites: 73, 151, 152, 477, 2706, 3010, 3197, 3768, 5979, 7028, 9145, 9477, 11467, 11719, 12308, 12372, 13617, 14766, 14793, 15289, 16189, 16234, 16256, 16270, 16311, 16362, 16526

## PIPELINE COMPARISON

We executed mtDNA-Server against different web services and command line tools. Since the mix-ups were too large for upload (> 50 MB), we used two publicly available data sets. For mtDNA-Server no parameters needed to be adjusted.

### Evaluated data sets:

- 1000G Project Phase1 sample HG00096
  - [http://mtdna-server.uibk.ac.at/assets/bam/HG00096.mapped.ILLUMINA.bwa.GBR.low\\_coverage.2010.1123.bam](http://mtdna-server.uibk.ac.at/assets/bam/HG00096.mapped.ILLUMINA.bwa.GBR.low_coverage.2010.1123.bam)
- Tumor/Benign sample TCGA-BH-A0BM-01A-11W-A071-09 / TCGA-BH-A0BM-01A-01W-A071-09
  - [https://github.com/riverlee/MitoSeek/blob/v1.3/Examples/brca\\_tumor.bam](https://github.com/riverlee/MitoSeek/blob/v1.3/Examples/brca_tumor.bam)
  - [https://github.com/riverlee/MitoSeek/blob/v1.3/Examples/brca\\_normal.bam](https://github.com/riverlee/MitoSeek/blob/v1.3/Examples/brca_normal.bam)

### Compared Pipelines including used parameter sets:

- **MitoSeek (version 1.3)**  
perl mitoSeek.pl -i <input.bam> -t 4 -sb 0 -hp 1 -d 5 -str 4 -sp 1 -sa 0
- **MToolBox on MSeqDR**  
Input format: BAM, reference sequence hg19+rCRS, Filtering and extra option: none, Minimum distance of ins/dels from read end: 5 bps, and Heteroplasmy threshold for FASTA consensus sequence: 0.8.
- **Galaxy Naive Variant Caller**  
Minimum base quality, Minimum mapping quality and Minimum number of reads needed to consider a REF/ALT needed = 20, ploidy = 1
- **Mit-o-matic**  
Read length 101, files converted to FASTQ with BamToFastq, alignment Tool BWA, Data Single-End, Heteroplasmy cut-off 10%.  
For HG00096 which was too big for upload, we used the command-line version:  
perl mitomatic.pl -c -t bwa -o se -f 10 -d hg00096\_10 -i HG00096.fastq
- **LoFreq**  
lofreq call HG00096.bam -o HG00096.vcf -f rCRSreference.fasta
- **MitoBamAnnotator**  
Unfortunately we were not able to run either of the samples on MitobamAnnotator.

**Supplementary Table 1: HG00096 Sample Evaluation**

| Mutation    | LoFreq high coverage (Gold standard) | LoFreq low coverage | Galaxy Naïve Variant Caller | MitoSeek | MSeqDR | Ye et al. | mtDNA-Server  |
|-------------|--------------------------------------|---------------------|-----------------------------|----------|--------|-----------|---------------|
| 1456 T/C    | <b>1.09%</b>                         |                     |                             |          | 1.20%  |           | <b>1.01%</b>  |
| 2746 T/C    | <b>1.84%</b>                         | 2.34%               | 2.47%                       | 2.40%    | 2.40%  | 2.29%     | <b>2.47%</b>  |
| 3200 T/C    | <b>0.93%</b>                         |                     |                             |          | 1.00%  |           | <b>1.02%</b>  |
| 12410 A/G   | <b>1.07%</b>                         | 1.27%               | 1.25%                       | 1.20%    | 1.00%  |           | <b>1.14%</b>  |
| 14071 A/G   | <b>0.99%</b>                         | 1.02%               | 1.16%                       |          | 1.20%  |           | <b>1.08%</b>  |
| 14569 G/A   | <b>50.15%</b>                        | 57.62%              | 57.71%                      | 58.00%   | 59.30% | 56.17%    | <b>57.56%</b> |
| 15463 A/G   | <b>0.89%</b>                         |                     |                             |          | 1.30%  | 1.08%     | <b>1.25%</b>  |
| 16093 T/C   | <b>56.83%</b>                        | 60.19%              | 60.91%                      |          | 60.20% | 59.46%    | <b>59.63%</b> |
| 16360 C/T   | <b>39.43%</b>                        | 39.43%              | 38.80%                      |          | 39.50% | 37.78%    | <b>38.56%</b> |
| *3488 T/A   |                                      |                     |                             | 1.10%    | 1.10%  |           |               |
| *6419 A/C   |                                      |                     | 4.52%                       | 1.50%    | 1.70%  |           |               |
| **10306 A/C |                                      |                     | 6.28%                       | 2.50%    | 1.80%  |           |               |

Supplementary Table 1: HG00096 high coverage has been analysed with LoFreq (~15,000 x) as a defined gold standard (bold). HG00096 low coverage data (~1,300 x) has then be executed on all web services and pipelines. Mutations highlighted in green are expected, red unexpected mutations. For unexpected, transversions only found on one strand are considered as artefacts and marked with \*. Error hot spot mutations reported by Li et al ((3)) are marked with \*\*. Mit-o-matic resulted in over 528 heteroplasmic sites when using 1% heteroplasmic threshold and 20 heteroplasmic sites with a 10% threshold, with a resulting haplogroup U8b1b1 instead of the expected H16a1 and was therefore excluded.

**Supplemental Table 2: Tumor Sample Evaluation**

| Tumor mtDNA Positions found as heteroplasmies (mean cov. 197 x) |                             |        |                    |          |              |
|-----------------------------------------------------------------|-----------------------------|--------|--------------------|----------|--------------|
| mit-o-matic                                                     | Galaxy Naïve Variant Caller | LoFreq | MToolbox on MSeqDR | MitoSeek | mtDNA-Server |
|                                                                 |                             |        |                    | 83       |              |
|                                                                 |                             |        |                    | 153      |              |
| 195                                                             | 195                         | 195    | 195                |          | 195 (81%)    |
|                                                                 |                             |        |                    | 217      |              |
|                                                                 |                             |        |                    | 290      |              |
| 1149                                                            |                             | 1149   | 1149               |          | 1149 (14%)   |
|                                                                 |                             | 2960   | 2960               |          | 2960 (7%)    |
|                                                                 |                             |        | 4878 (G/GC)        |          |              |
|                                                                 |                             |        | 5181 (A/G)         |          |              |
| 6419                                                            |                             |        |                    |          |              |

|              |              |              |              |  |                    |
|--------------|--------------|--------------|--------------|--|--------------------|
|              | 8165         | 8165         | 8165         |  | 8165 (36%)         |
|              |              |              | 8940 (C/T)   |  |                    |
| 10306*       |              |              |              |  |                    |
| 12414        |              | 12414        | 12414        |  | 12414 (98%)        |
| 12661        | 12661        | 12661        | 12661        |  | 12661 (24%)        |
|              | 15612        | 15612        | 15612        |  | 15612 (37%)        |
| <b>16271</b> | <b>16271</b> | <b>16271</b> | <b>16271</b> |  | <b>16271 (15%)</b> |

Supplementary Table 2: The original mutations reported by MitoSeek couldn't be confirmed with either of the web-servers or LoFreq. Entries in the table represent heteroplasmic mutations annotated by the positions on the rCRS. Mutations highlighted in red are possible false positives. Mutations on 6419 and 10306 are transversions. Mutations marked with \* are reported error hot spot by Li et al, 2010 (see Paper for reference). Additional mutations found with MToolBox on 4878, 5181, 8940 can be explained either by length heteroplasmies or sequencing issues and can't be interpreted as correct, nor false positives without further investigation.

### Supplemental Table 3: Benign Sample Evaluation

| Benign mtDNA Positions found as heteroplasmies (mean cov. 55 x ) |                             |              |                    |          |                    |
|------------------------------------------------------------------|-----------------------------|--------------|--------------------|----------|--------------------|
| mit-o-matic                                                      | Galaxy Naive Variant Caller | LoFreq       | MToolbox on MSeqDR | MitoSeek | mtDNA-Server       |
|                                                                  |                             |              |                    | 45       |                    |
|                                                                  |                             |              |                    | 48       |                    |
|                                                                  |                             |              |                    | 98       |                    |
|                                                                  |                             |              |                    | 99       |                    |
|                                                                  |                             |              |                    | 195      |                    |
| 213T/A                                                           |                             |              |                    |          |                    |
|                                                                  |                             |              |                    | 239      |                    |
| 4657A/G                                                          |                             |              |                    |          |                    |
| 4658A/G                                                          |                             |              |                    |          |                    |
| 6419A/C                                                          |                             |              |                    |          |                    |
| 10197G/C                                                         |                             |              |                    |          |                    |
| 10306A/C*                                                        |                             | 10306*       |                    |          |                    |
| <b>16271</b>                                                     | <b>16271</b>                | <b>16271</b> | <b>16271</b>       |          | <b>16271 (16%)</b> |

Supplementary Table 3: The original mutations reported by MitoSeek

([http://htmlpreview.github.io/?https://github.com/riverlee/MitoSeek/blob/release/brca\\_tumor/mitoSeek.html](http://htmlpreview.github.io/?https://github.com/riverlee/MitoSeek/blob/release/brca_tumor/mitoSeek.html))

couldn't be confirmed with either of the web-servers or LoFreq. Entries in the table represent heteroplasmic mutations annotated by the positions on the rCRS. Mutations highlighted in red are possible

false positives. \*Mutation on 10306 is reported as error hot spot by Li et al. Mutation 16271 found in tumor and benign hints to a germline mutation.
